# Supplementary material for: C. elegans SIRT6/7 Homolog SIR-2.4 Promotes DAF-16 Relocalization and Function during Stress
Source: PubMed Central journal article supplement (PMC3441721; doi:10.1371/journal.pgen.1002948), 2012-09-13

**Fig. S4**

**A.**

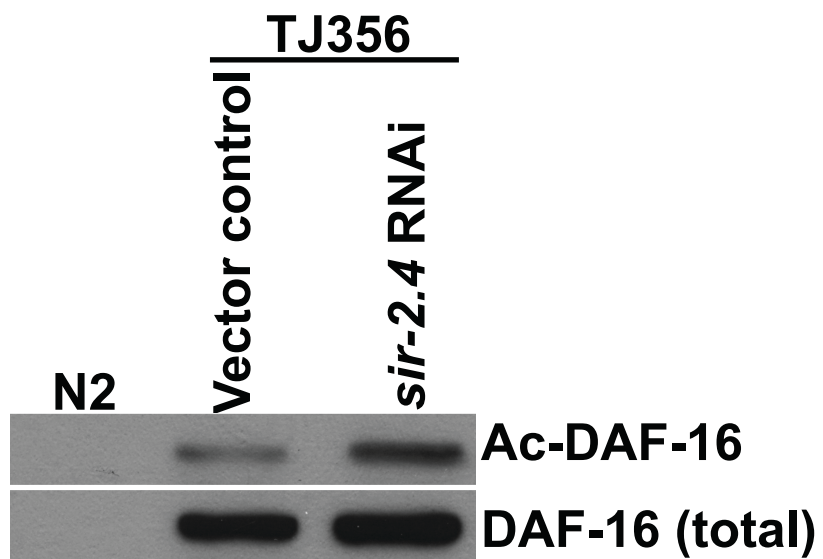

**B.**

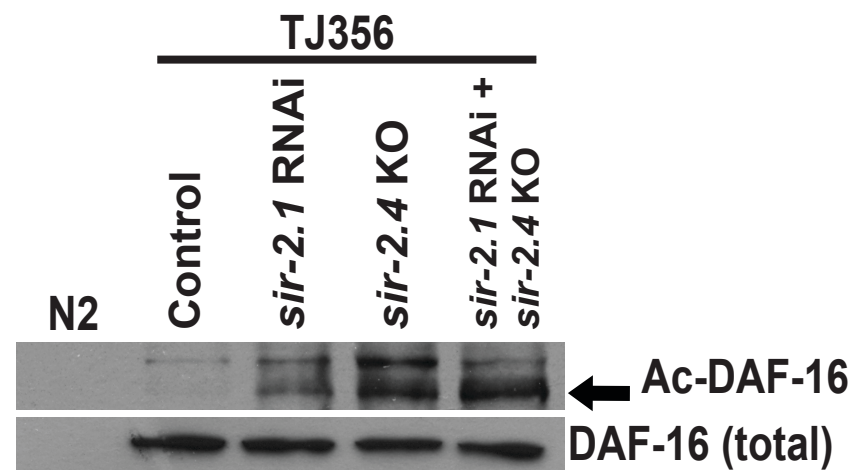

Supplement: pgen.1002948.s004.pdf [file pgen.1002948.s004.pdf]
