# Supplementary material for: C. elegans SIRT6/7 Homolog SIR-2.4 Promotes DAF-16 Relocalization and Function during Stress
Source: PubMed Central journal article supplement (PMC3441721; doi:10.1371/journal.pgen.1002948), 2012-09-13
Supplement: pgen.1002948.s006.pdf [file pgen.1002948.s006.pdf]

**Table S1**

| Strains                                       | Stress                        | Mean survival ± s.e.m. (hours) | 75th percentile (hours) | n       | P                                                                 |
|-----------------------------------------------|-------------------------------|--------------------------------|-------------------------|---------|-------------------------------------------------------------------|
| N2, control *                                 | Heat-shock                    | 12.05 ± 0.05                   | 13                      | 94/102  |                                                                   |
| N2, <i>daf-16(RNAi)</i> *                     | Heat-shock                    | 9.89 ± 0.10                    | 11                      | 101/102 | < 0.0001 <sup>a</sup>                                             |
| <i>sir-2.4(n5137)</i> , control *             | Heat-shock                    | 10.30 ± 0.11                   | 11                      | 96/102  | < 0.0001 <sup>a</sup>                                             |
| <i>sir-2.4(n5137)</i> , <i>daf-16(RNAi)</i> * | Heat-shock                    | 9.63 ± 0.09                    | 10                      | 100/102 | < 0.0001 <sup>a</sup> , 0.0611 <sup>b</sup> , 0.0001 <sup>c</sup> |
| N2, control                                   | Heat-shock                    | 11.04 ± 0.08                   | 12                      | 102/120 |                                                                   |
| N2, <i>daf-16(RNAi)</i>                       | Heat-shock                    | 9.46 ± 0.09                    | 11                      | 109/120 | < 0.0001 <sup>a</sup>                                             |
| <i>sir-2.4(n5137)</i> , control               | Heat-shock                    | 10.68 ± 0.06                   | 11                      | 80/90   | < 0.0228 <sup>a</sup>                                             |
| <i>sir-2.4(n5137)</i> , <i>daf-16(RNAi)</i>   | Heat-shock                    | 9.81 ± 0.08                    | 11                      | 87/90   | < 0.0001 <sup>a</sup> , 0.0936 <sup>b</sup> , 0.0001 <sup>c</sup> |
| N2, control *                                 | H <sub>2</sub> O <sub>2</sub> | 10.31 ± 0.21                   | 12                      | 86/90   |                                                                   |
| N2, <i>sir-2.4(RNAi)</i> *                    | H <sub>2</sub> O <sub>2</sub> | 7.30 ± 0.24                    | 8                       | 88/90   | < 0.0001 <sup>a</sup>                                             |
| <i>daf-16(mu86)</i> , control *               | H <sub>2</sub> O <sub>2</sub> | 7.63 ± 0.21                    | 10                      | 89/90   | < 0.0001 <sup>a</sup>                                             |
| <i>daf-16(mu86)</i> , <i>sir-2.4(RNAi)</i> *  | H <sub>2</sub> O <sub>2</sub> | 6.87 ± 0.12                    | 8                       | 90/90   | < 0.0001 <sup>a</sup> , 0.0004 <sup>b</sup> , 0.2423 <sup>c</sup> |
| N2, control                                   | H <sub>2</sub> O <sub>2</sub> | 10.96 ± 0.23                   | 12                      | 90/90   |                                                                   |
| N2, <i>sir-2.4(RNAi)</i>                      | H <sub>2</sub> O <sub>2</sub> | 8.95 ± 0.33                    | 10                      | 88/90   | < 0.0001 <sup>a</sup>                                             |
| <i>daf-16(mu86)</i> , control                 | H <sub>2</sub> O <sub>2</sub> | 7.98 ± 0.23                    | 10                      | 86/90   | < 0.0001 <sup>b</sup>                                             |
| <i>daf-16(mu86)</i> , <i>sir-2.4(RNAi)</i>    | H <sub>2</sub> O <sub>2</sub> | 8.59 ± 0.37                    | 10                      | 84/90   | < 0.0001 <sup>a</sup> , 0.1728 <sup>b</sup> , 0.6965 <sup>c</sup> |
| N2                                            | Heat-shock                    | 16.07 ± 0.20                   | 18                      | 79/84   | -                                                                 |
| <i>sir-2.4(n5137)</i>                         | Heat-shock                    | 14.71 ± 0.17                   | 16                      | 79/84   | < 0.0001                                                          |
| N2                                            | H <sub>2</sub> O <sub>2</sub> | 8.75 ± 0.09                    | 8                       | 72/72   | -                                                                 |
| <i>sir-2.4(n5137)</i>                         | H <sub>2</sub> O <sub>2</sub> | 7.65 ± 0.11                    | 8                       | 72/72   | < 0.0001                                                          |
| N2 *                                          | Heat-shock                    | 12.84 ± 0.61                   | 19                      | 98/140  | -                                                                 |
| <i>daf-16(RNAi)</i> *                         | Heat-shock                    | 9.81 ± 0.32                    | 17                      | 102/140 | 0.0001                                                            |
| <i>sir-2.4(RNAi)</i> *                        | Heat-shock                    | 9.34 ± 0.19                    | 17                      | 143/176 | < 0.0001                                                          |
| N2                                            | Heat-shock                    | 15.52 ± 1.02                   | 24                      | 116/140 | -                                                                 |
| <i>daf-16(RNAi)</i>                           | Heat-shock                    | 11.70 ± 0.32                   | 20                      | 134/140 | < 0.0001                                                          |
| <i>sir-2.4(RNAi)</i>                          | Heat-shock                    | 11.07 ± 0.19                   | 20                      | 163/176 | < 0.0001                                                          |
| N2                                            | Heat-shock                    | 15.84 ± 0.74                   | 22                      | 103/160 | -                                                                 |
| <i>daf-16(RNAi)</i>                           | Heat-shock                    | 11.70 ± 0.68                   | 15                      | 118/160 | 0.0004                                                            |
| <i>sir-2.4(RNAi)</i>                          | Heat-shock                    | 10.53 ± 0.41                   | 15                      | 145/196 | < 0.0001                                                          |
| N2 *                                          | H <sub>2</sub> O <sub>2</sub> | 7.58 ± 0.06                    | 8                       | 140/160 | -                                                                 |
| <i>daf-16(RNAi)</i> *                         | H <sub>2</sub> O <sub>2</sub> | 5.33 ± 0.08                    | 5.5                     | 156/160 | < 0.0001                                                          |
| <i>sir-2.4(RNAi)</i> *                        | H <sub>2</sub> O <sub>2</sub> | 5.14 ± 0.08                    | 5.5                     | 191/196 | < 0.0001                                                          |
| N2                                            | H <sub>2</sub> O <sub>2</sub> | 11.68 ± 0.10                   | 8                       | 134/160 | -                                                                 |
| <i>daf-16(RNAi)</i>                           | H <sub>2</sub> O <sub>2</sub> | 5.81 ± 0.06                    | 5                       | 152/160 | < 0.0001                                                          |
| <i>sir-2.4(RNAi)</i>                          | H <sub>2</sub> O <sub>2</sub> | 5.68 ± 0.10                    | 5                       | 183/196 | < 0.0001                                                          |
| N2; control                                   | Heat-shock                    | 12.01 ± 0.26                   | 13                      | 65/72   | -                                                                 |
| N2; <i>cbp-1(RNAi)</i>                        | Heat-shock                    | 9.09 ± 0.32                    | 11                      | 68/72   | < 0.0001                                                          |
| N2; control                                   | H <sub>2</sub> O <sub>2</sub> | 11.56 ± 0.22                   | 13                      | 72/72   | -                                                                 |
| N2; <i>cbp-1(RNAi)</i>                        | H <sub>2</sub> O <sub>2</sub> | 7.72 ± 0.16                    | 9                       | 72/72   | < 0.0001                                                          |
| N2 *                                          | Heat-shock                    | 17.08 ± 0.25                   | 19                      | 81/90   | -                                                                 |
| EQ137 ( <i>sir-2.4::gfp</i> o.e.) *           | Heat-shock                    | 16.16 ± 0.24                   | 19.2                    | 86/86   | 0.1506                                                            |
| N2                                            | Heat-shock                    | 12.70 ± 0.18                   | 13                      | 65/65   | -                                                                 |
| EQ137 ( <i>sir-2.4::gfp</i> o.e.)             | Heat-shock                    | 12.16 ± 0.16                   | 14                      | 54/72   | 0.4989                                                            |
| N2 *                                          | Heat-shock                    | 10.90 ± 0.13                   | 11                      | 36/36   | -                                                                 |
| EQ158 ( <i>sir-2.4</i> o.e.) *                | Heat-shock                    | 11.07 ± 0.16                   | 11.5                    | 30/30   | 0.4654                                                            |

**Table S1. Effects of *sir-2.4* expression on stress resistance.** Animals grown on vector control, *daf-16* or *sir-2.4* RNAi bacteria were exposed to heat or oxidative stress. Mean survival ± SEM, in hours, observed in the stress analysis was shown in the table. 75th percentile is the time at which the fraction of animals alive reaches 0.25. 'n' indicates the number of animals scored in the each experiment. P-Values calculated by pair-wise comparisons to vector control of the same experiment. We used Stata 8 software for statistical analysis and to determine means and percentiles. The logrank (Mantel-Cox) test was used to test the hypothesis that the survival functions among groups were equal. <sup>a</sup> P-Values calculated by pair-wise comparisons to N2 grown on vector control of the same experiment. <sup>b</sup> Compared to N2 grown on the same RNAi bacteria. <sup>c</sup> Compared to the same mutants grown on vector control. \* indicates the sets of experiments plotted and shown in Figures.
